# Supplementary material for: A Quorum-Sensing Inhibitor Strain of Vibrio alginolyticus Blocks Qs-Controlled Phenotypes in Chromobacterium violaceum and Pseudomonas aeruginosa
Source: PubMed Central journal article supplement (PMC6780304; doi:10.3390/md17090494), 2019-08-24
Supplement: marinedrugs-17-00494-s001.pdf [file marinedrugs-17-00494-s001.pdf]

Supplementary Materials:

## A quorum-sensing inhibitor strain of *Vibrio alginolyticus* blocks QS-controlled phenotypes in *Chromobacterium violaceum* and *Pseudomonas aeruginosa*

José Carlos Reina<sup>1</sup>, Ignacio Pérez-Victoria<sup>2,\*</sup>, Jesús Martín<sup>2</sup> and Inmaculada Llamas<sup>1,3\*</sup>

- <sup>1</sup> Department of Microbiology, Faculty of Pharmacy, University of Granada, Campus Universitario Cartuja s/n, 18071 Granada, Spain
- <sup>2</sup> MEDINA Foundation, Andalusian Center of Excellence for Research into Innovative Medicines, Health Science Technology Park, Avda. del Conocimiento 34, 18016 Armilla, Granada, Spain.
- <sup>3</sup> Institute of Biotechnology, Biomedical Research Center (CIBM), University of Granada, 18100 Granada, Spain

\* Correspondence: [illamas@ugr.es](mailto:illamas@ugr.es) (I.L.), [ignacio.perez-victoria@medinaandalucia.es](mailto:ignacio.perez-victoria@medinaandalucia.es) (I.P.V.)

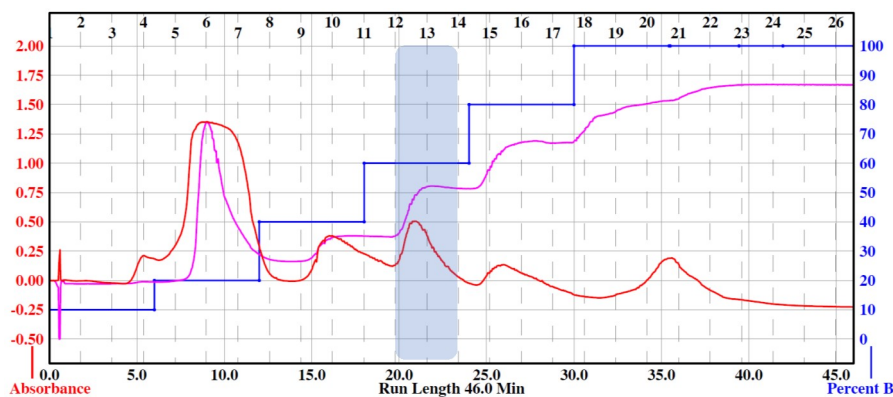

**Supplementary Figure S1.** Low resolution flash chromatography after solid phase extraction of the fermentation broth using SP207ss resin (Solvent A: water, Solvent B: acetone; Flow rate: 10 mL/min; Red trace: 210 nm, Purple trace: 280 nm). Fractions 12 and 13 displaying QSI activity are highlighted.

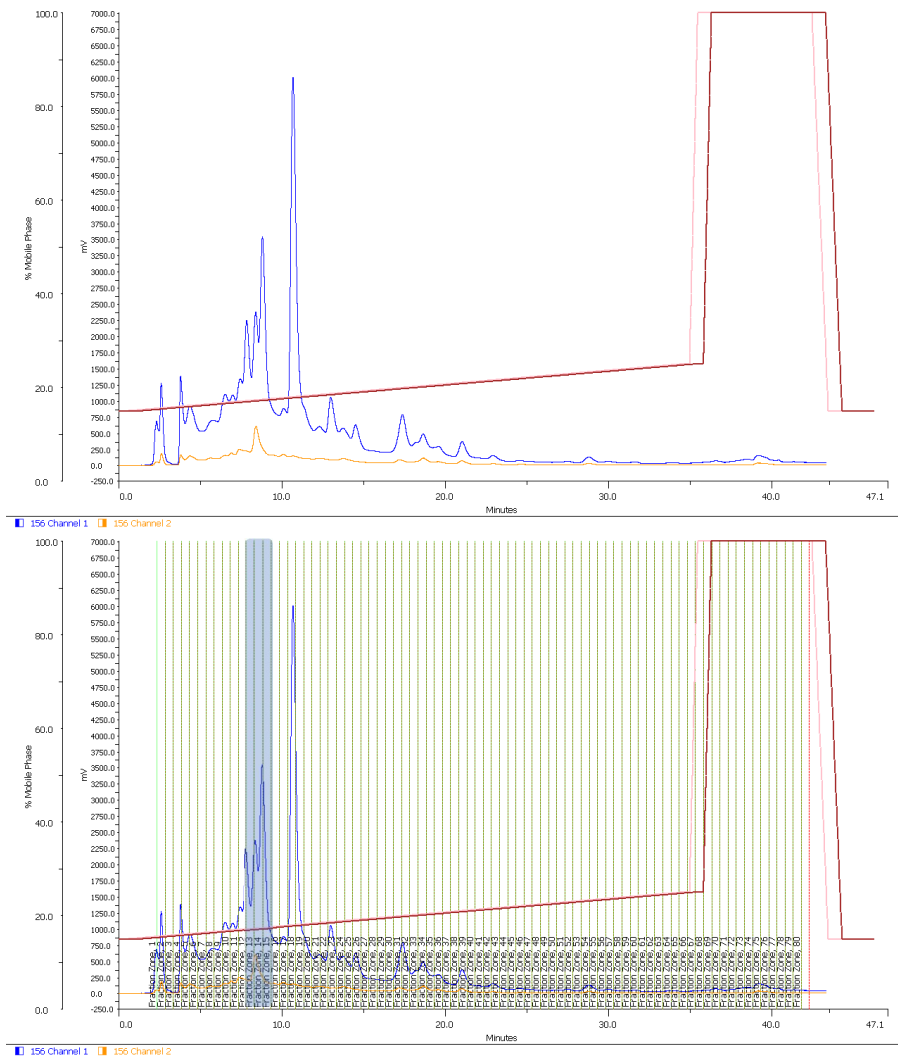

**Supplementary Figure S2.** Semipreparative HPLC chromatographic fractionation of the pool of the two active fractions (12 and 13) obtained after the previous low-resolution flash chromatography step (Solvent A: water, Solvent B: acetonitrile; Flow rate: 10 mL/min). Fractions 12, 13 and 14 displaying QSI activity are highlighted.

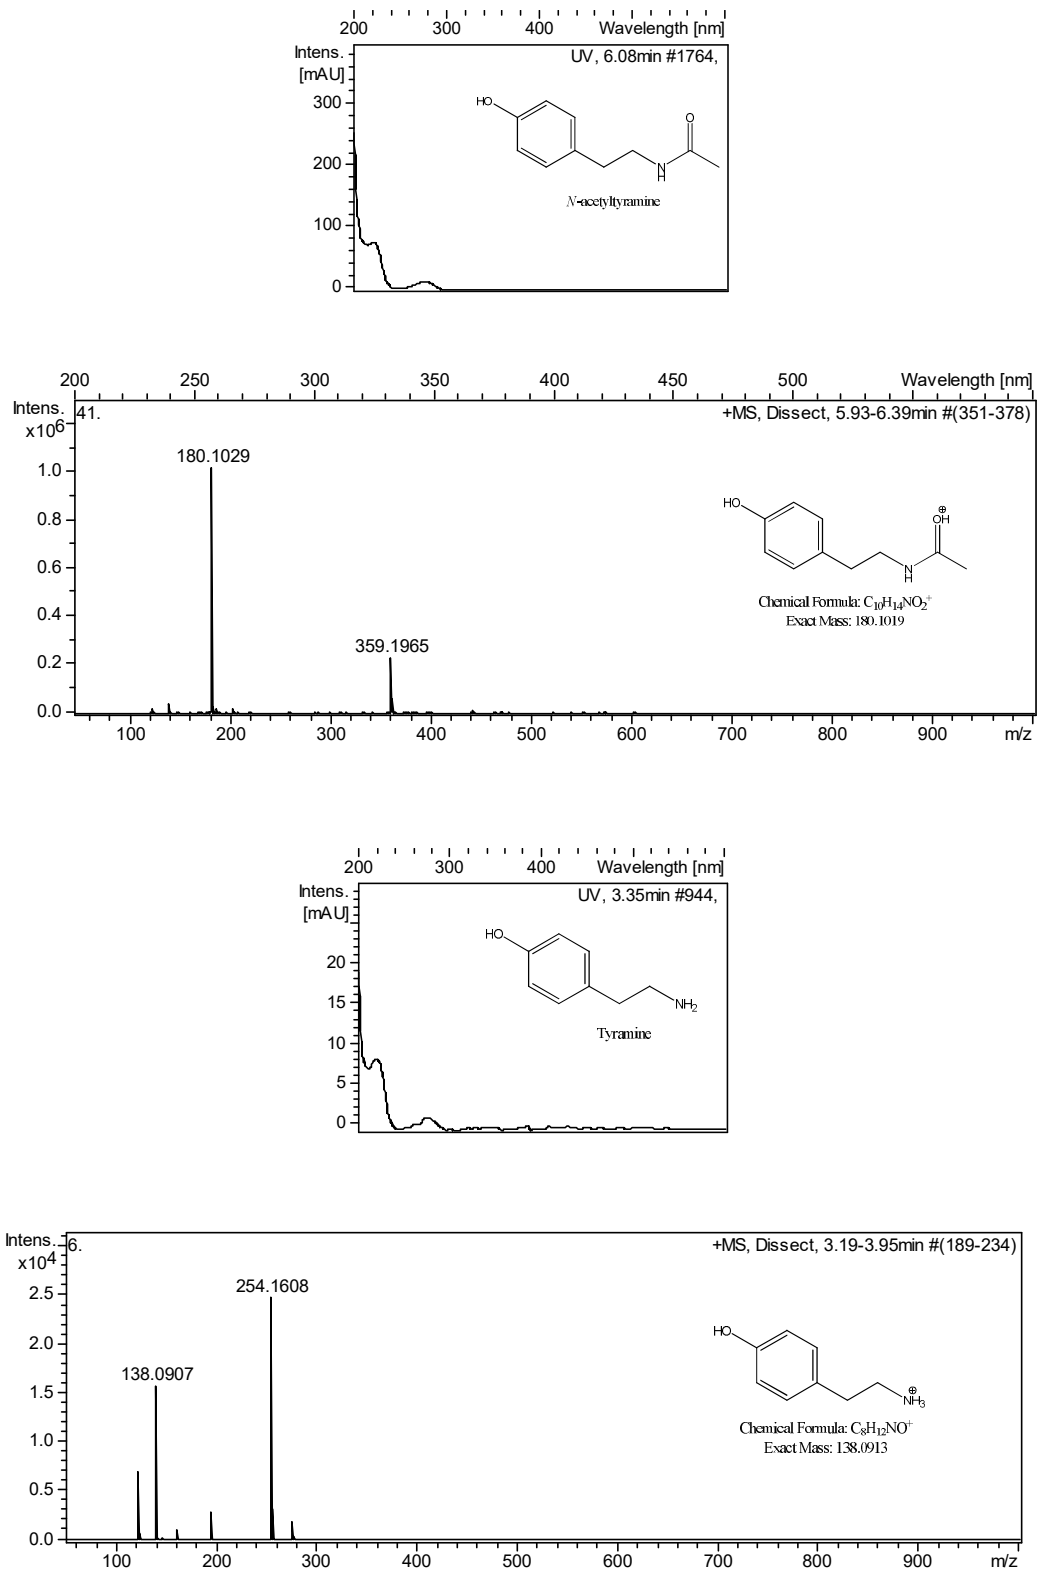

**Supplementary Figure S3.** UV-vis (DAD) and HRMS spectra of N-acetyltyramine (two upper spectra) and tyramine (two lower spectra) detected after LC-DAD-HRMS analysis of the three semipreparative HPLC fractions which showed QSI activity. The two compounds were observed in the three fractions, whose DAD and HRMS spectra, along with their retention time, were employed for their dereplication using our in-house databases [1,2].

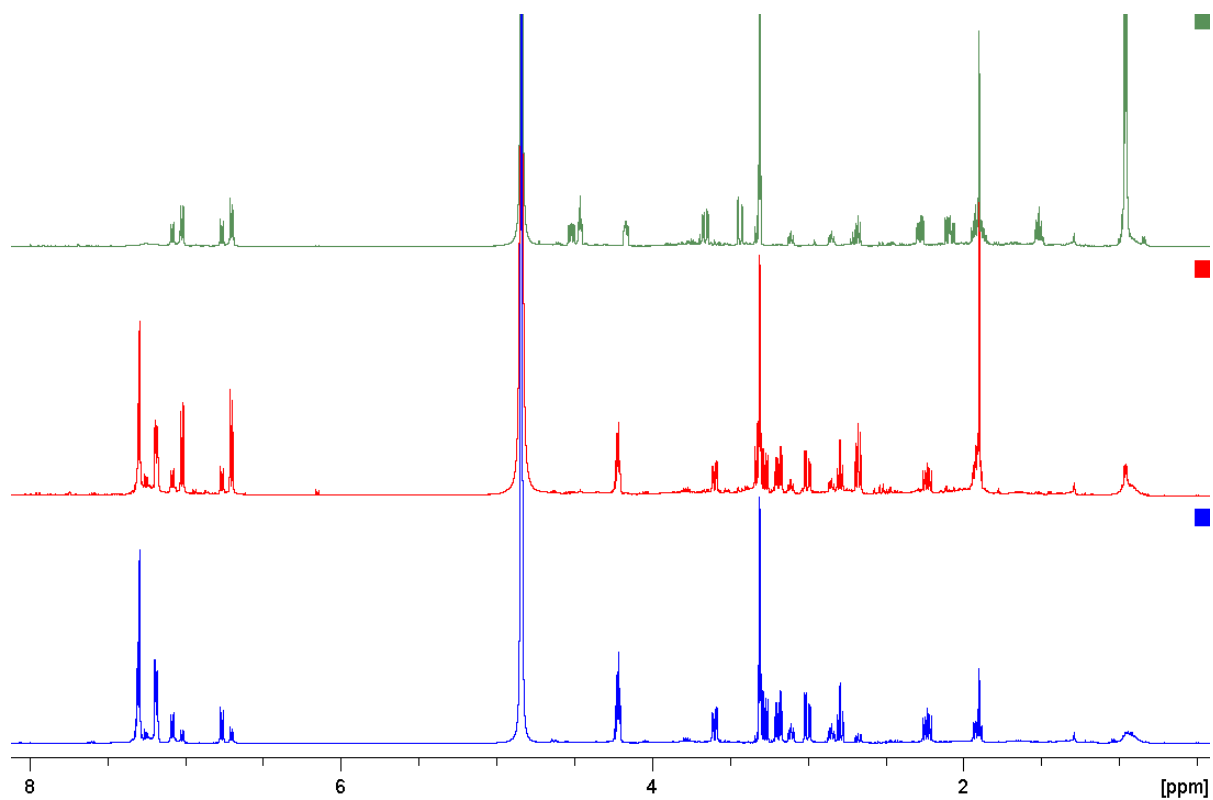

**Supplementary Figure S4.**  $^1\text{H}$  NMR spectra of QSI-active HPLC fractions 12 (green), 13 (red) and 14 (blue), (500 MHz,  $\text{CD}_3\text{OD}$ ).

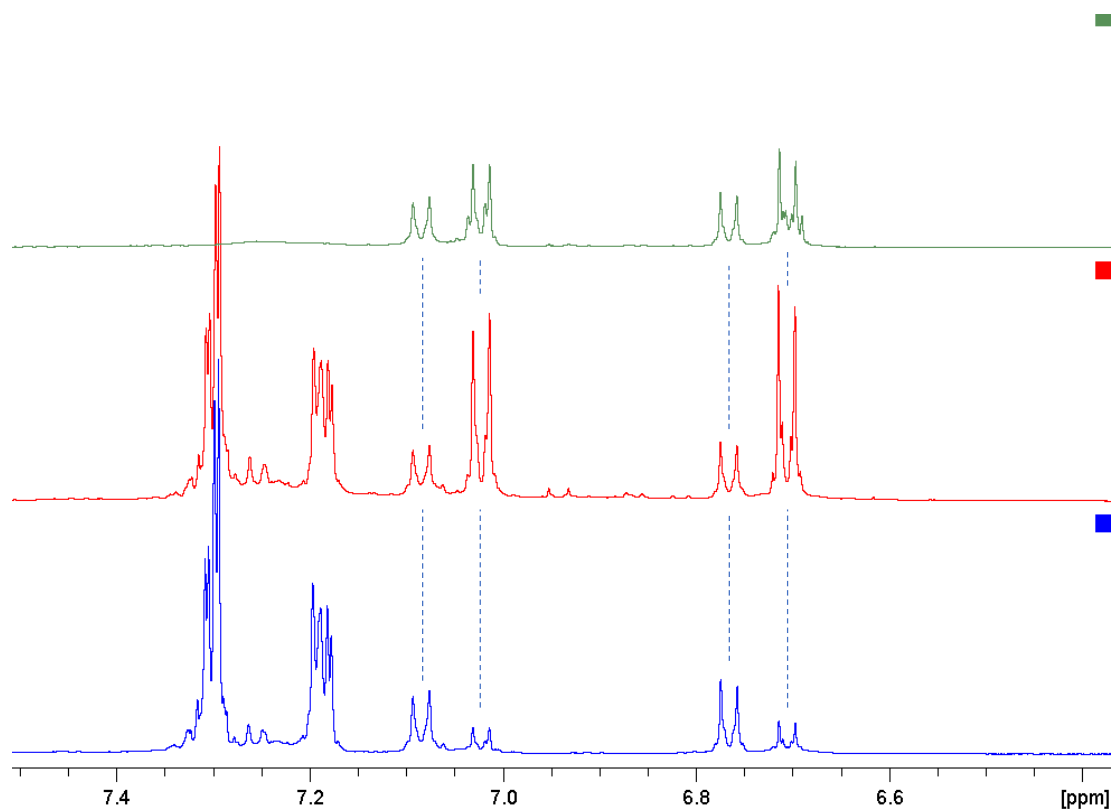

**Supplementary Figure S5.** Expansion of Fig. S4 spectra, indicating the common aromatic signals observed in all three spectra.

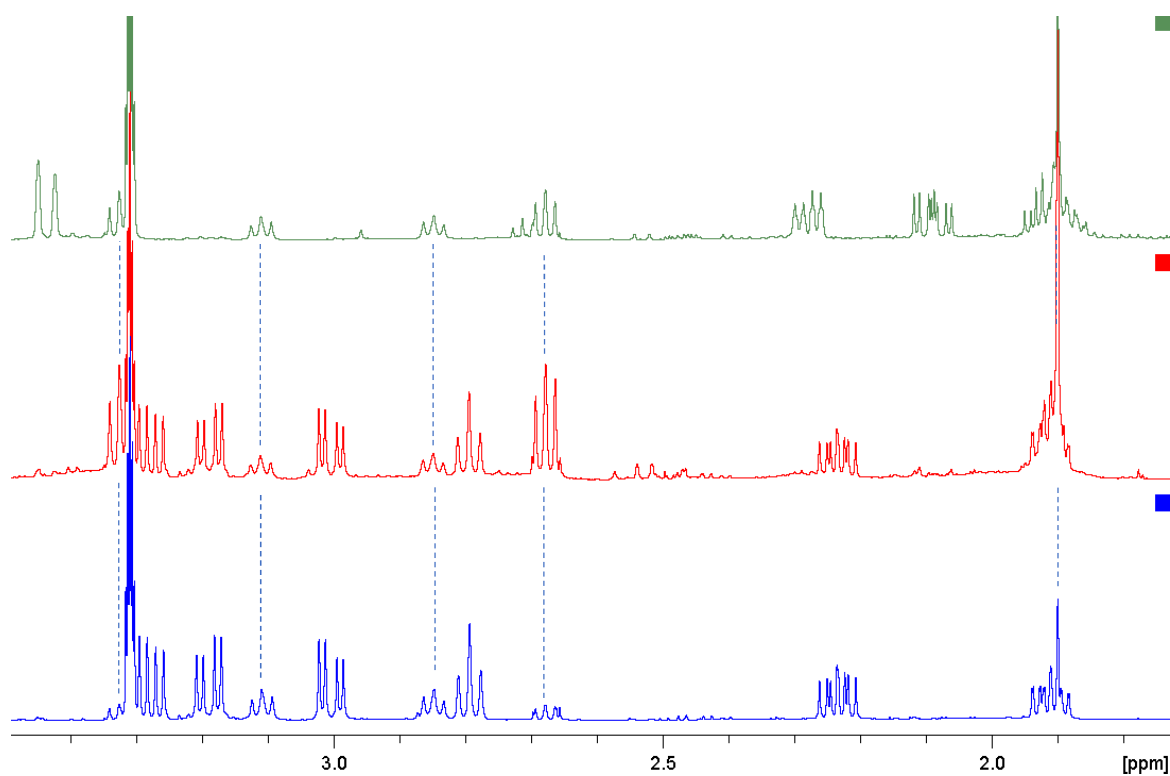

**Supplementary Figure S6.** A further expansion of Fig. S4 spectra, indicating the common aliphatic signals observed in all three spectra.

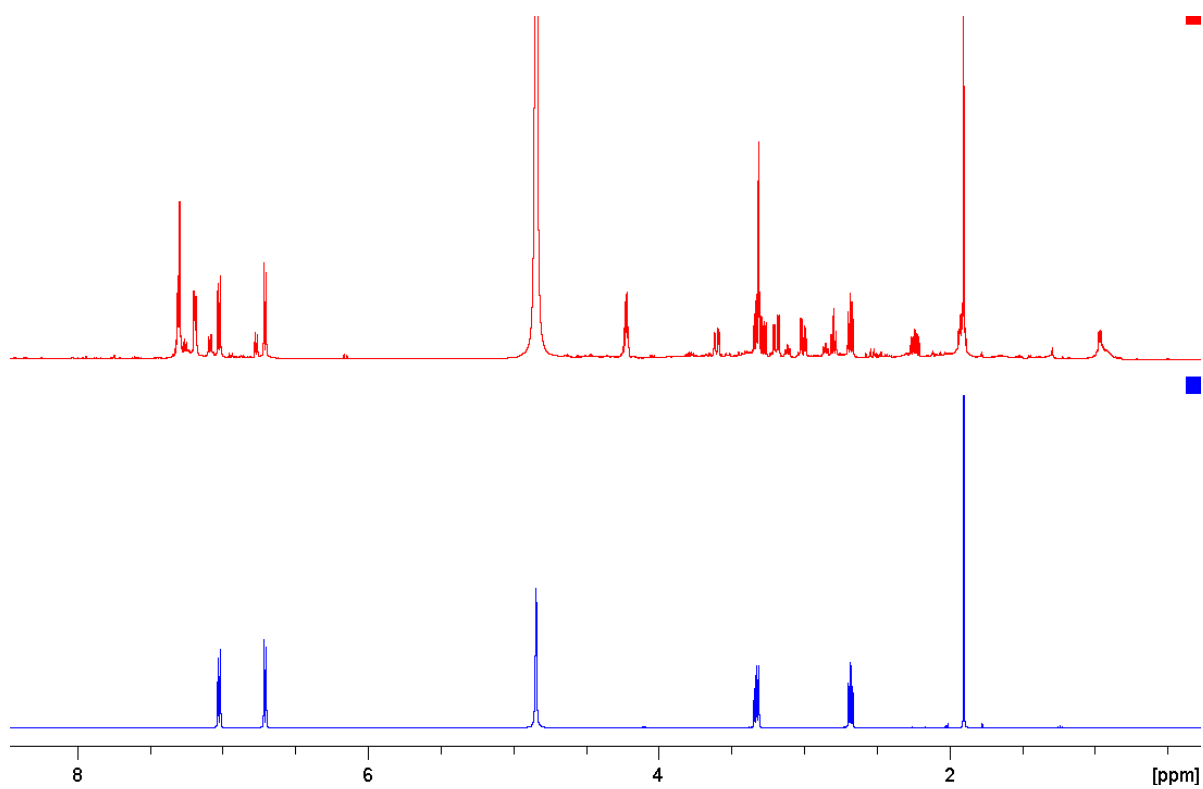

**Supplementary Figure S7.** <sup>1</sup>H NMR spectra of QSI-active HPLC fraction 13 (red) and N-acetyltyramine standard (blue) (500 MHz, CD<sub>3</sub>OD).

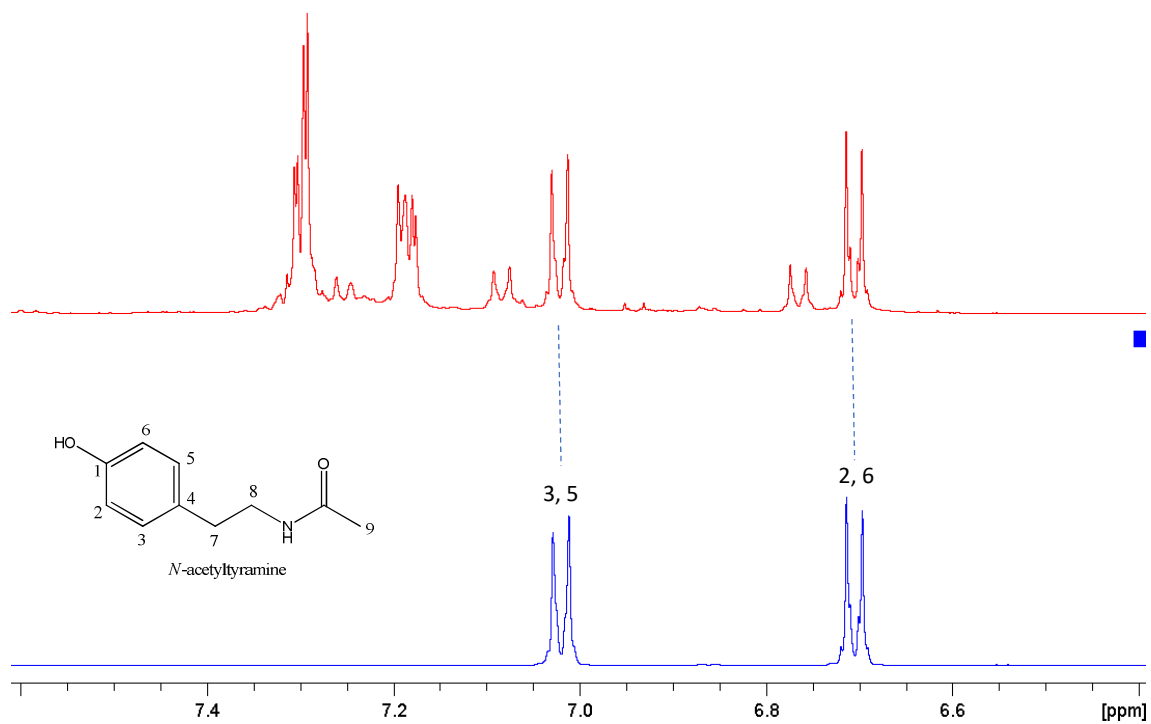

**Supplementary Figure S8.** Expansion of spectra in Supplementary Figure S7, indicating the identification of the aromatic signals from *N*-acetyltyramine.

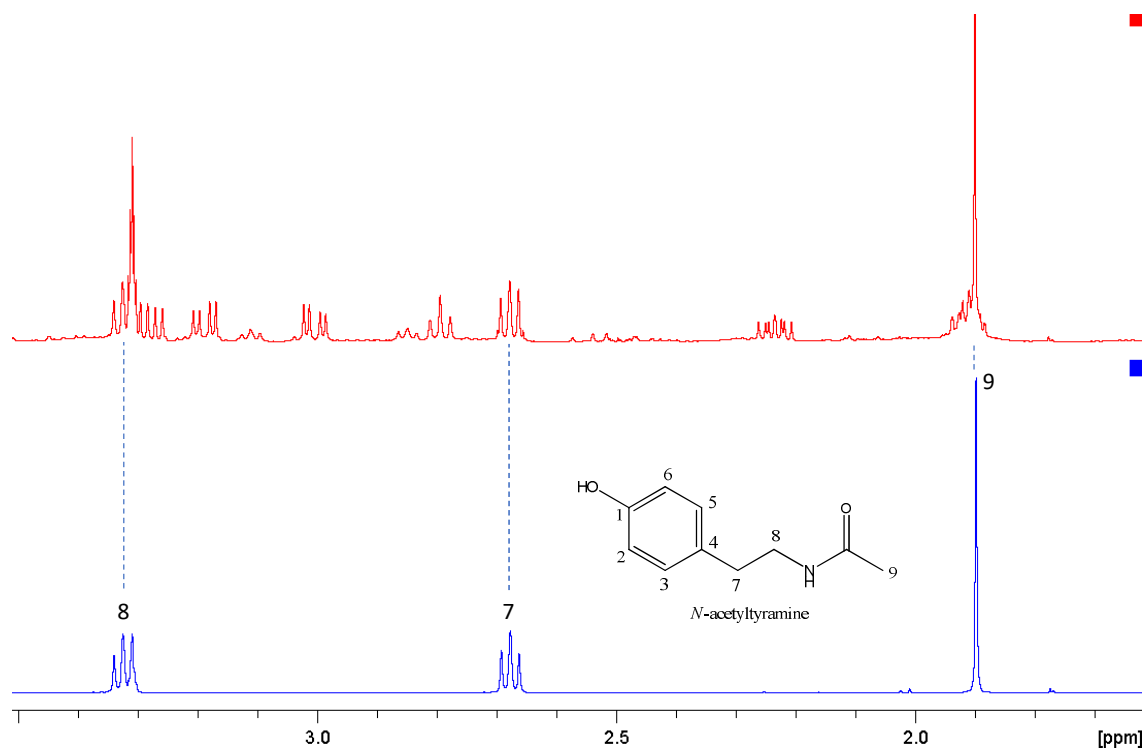

**Supplementary Figure S9.** A further expansion of the spectra in Supplementary Figure S7, indicating the identification of the aliphatic signals from *N*-acetyltyramine.

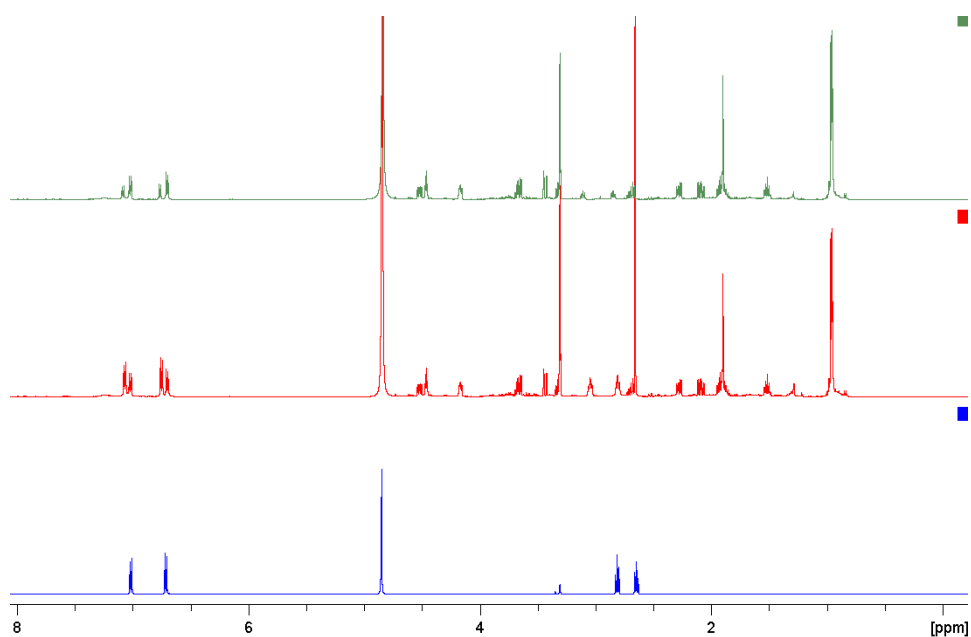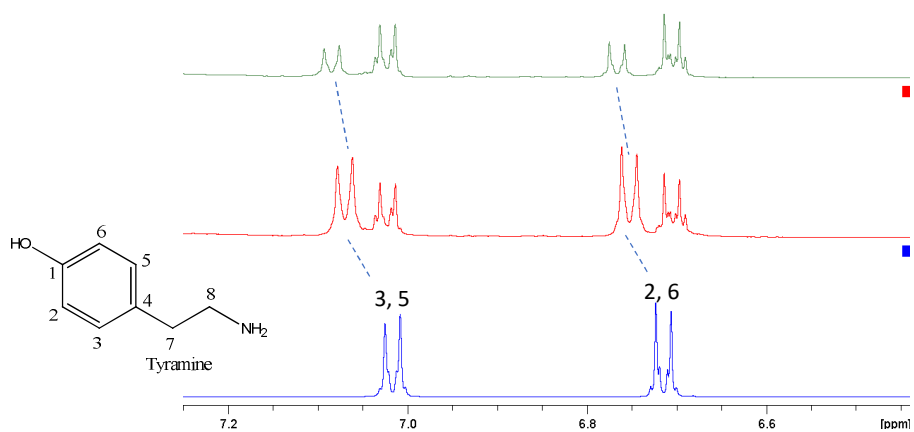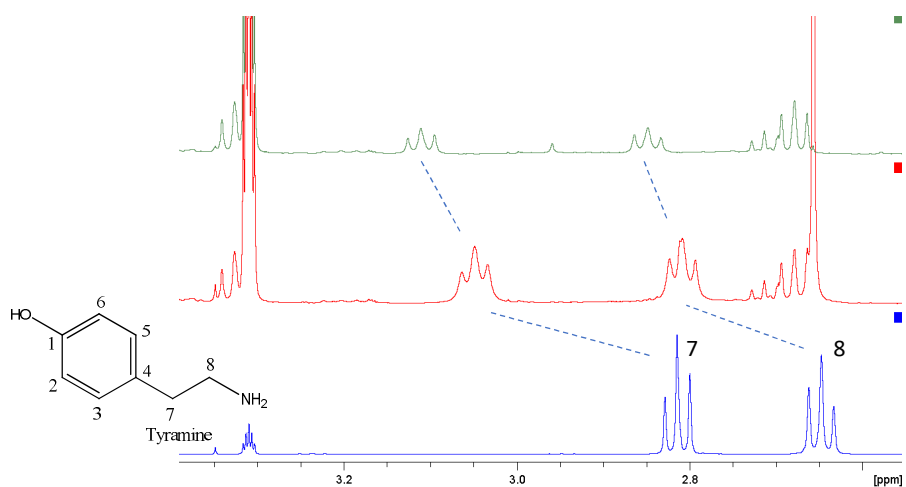

**Supplementary Figure S10.** <sup>1</sup>H NMR spectra of QSI-active HPLC fraction 12 (green), the same fraction spiked with pure tyramine (red) and tyramine standard (blue) (500 MHz, CD<sub>3</sub>OD). The expansions indicate the identification of the aromatic (first expansion) and aliphatic (second expansion) signals from tyramine.

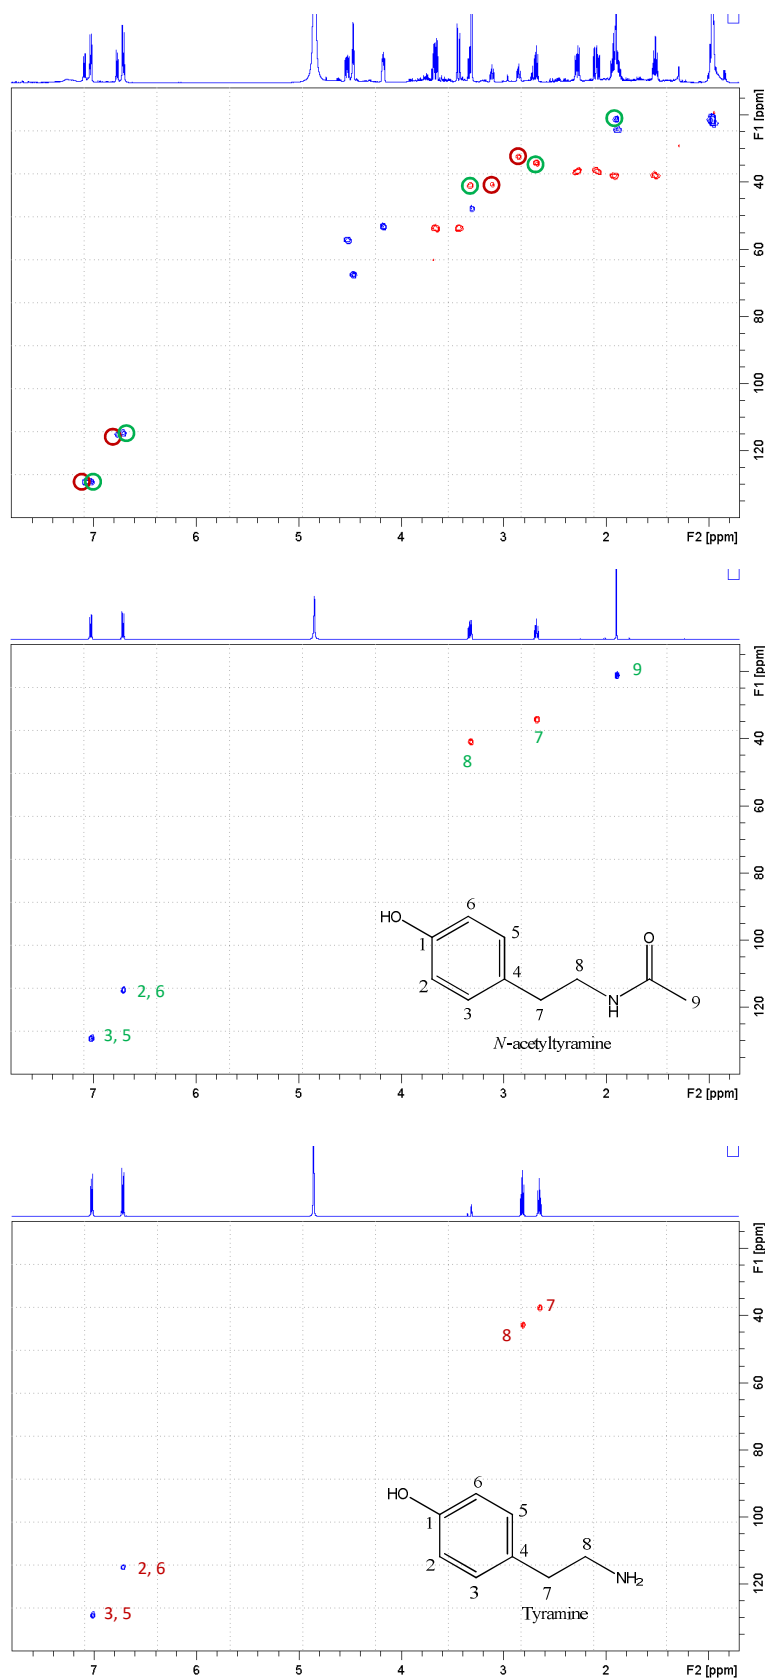

**Supplementary Figure S11.** HSQC spectra of QSI-active HPLC fraction 12 (upper), N-acetyltyramine standard (middle) and tyramine standard (lower). Signals from these two molecules are highlighted in the upper spectrum, where the non-highlighted signals correspond to cyclo-(L-Leu-L-trans-4-hydroxyproline) [3].



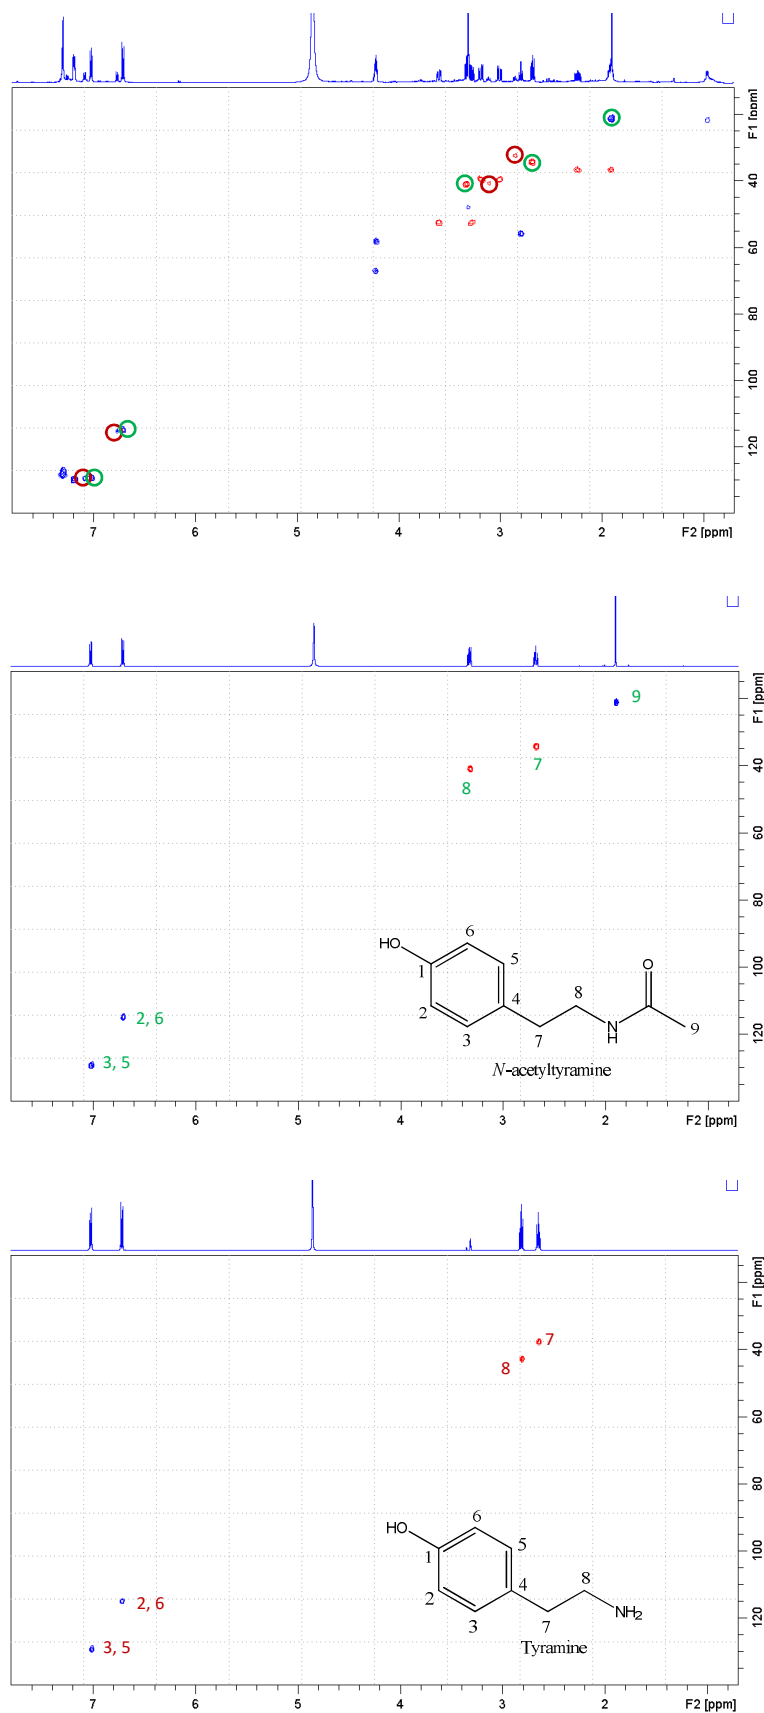

**Supplementary Figure S12.** HSQC spectra of QSI-active HPLC fraction 13 (upper), N-acetytyramine standard (middle) and tyramine standard (lower). Signals from these two molecules are highlighted in the upper spectrum, where the non-highlighted signals correspond to cyclo-(D-Phe-L-trans-4-hydroxyproline)[4]

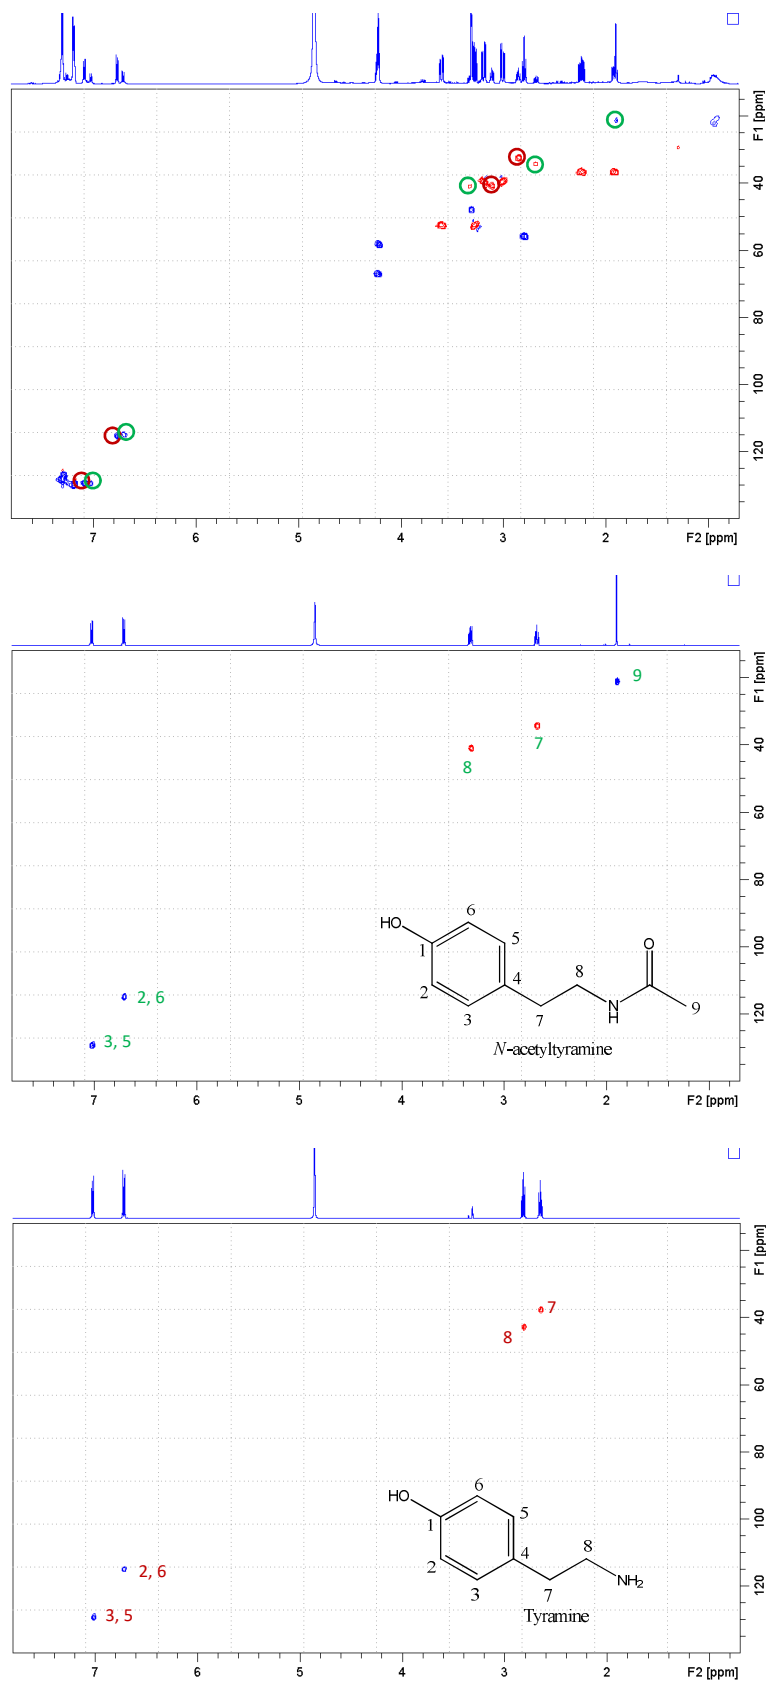

**Supplementary Figure S13.** HSQC spectra of QSI-active HPLC fraction 13 (upper), N-acetyltyramine standard (middle) and tyramine standard (lower). Signals from these two molecules are highlighted in the upper spectrum, where the non-highlighted signals correspond to cyclo-(D-Phe-L-trans-4-hydroxyproline) [4].

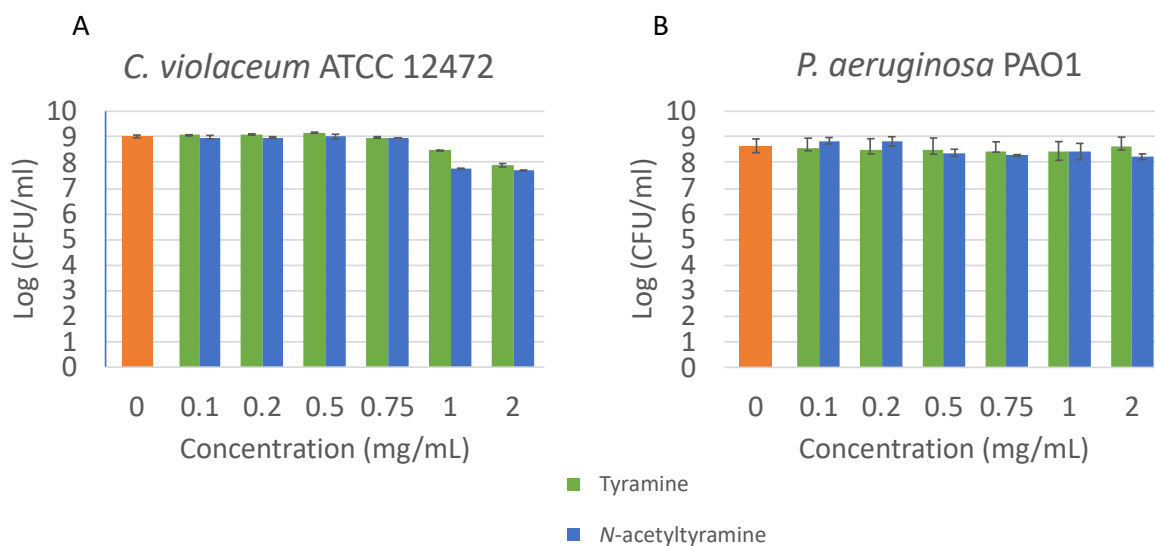

**Figure S14.** Growth of *C. violaceum* ATCC 12472 (A) and *P. aeruginosa* PAO1 (B) in the absence and presence of different concentrations of tyramine and N-acetyltyramine. Bacterial growth was measured by colony counting onto LB plates after incubating the bacteria in each condition for 24h. Data are presented as the logarithm of mean CFU  $\pm$  SD, n=3.

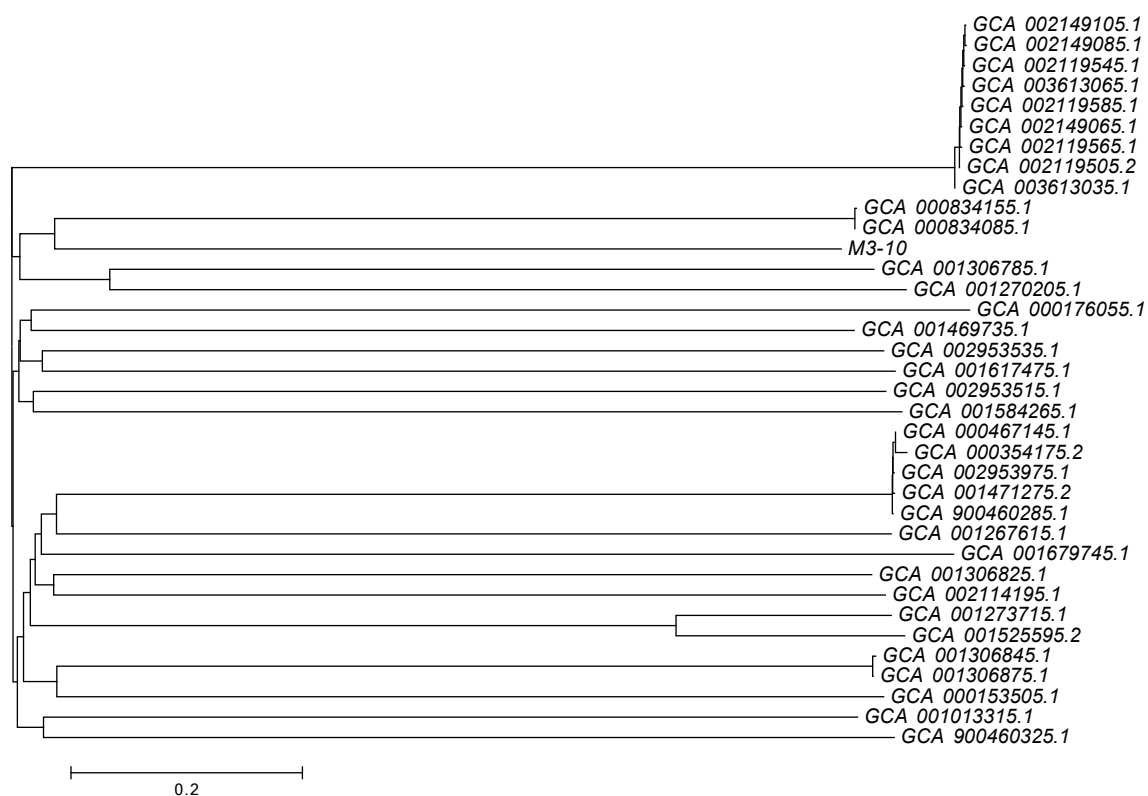

**Figure S15.** Neighbor-Joining distance clustering tree based on the ANI values between M3-10 and the rest of the *Vibrio alginolyticus* genomes available in NCBI.

**Supplementary Table S1.** NMR assignment (protonated carbons) of tyramine and *N*-acetyltyramine signals observed in the three QSI-active HPLC fractions (500 MHz, CD<sub>3</sub>OD).

| Position | Tyramine   |                              | <i>N</i> -acetyltyramine |                              |
|----------|------------|------------------------------|--------------------------|------------------------------|
|          | $\delta_c$ | $\delta_H$ ( <i>J</i> in Hz) | $\delta_c$               | $\delta_H$ ( <i>J</i> in Hz) |
| 2, 6     | 115.3      | 6.77, d (8.4)                | 114.9                    | 6.71, d (8.4)                |
| 3, 5     | 129.3      | 7.08, d (8.4)                | 129.3                    | 7.02, d (8.4)                |
| 7        | 32.4       | 2.85, t (7.3)                | 34.3                     | 2.68, t (7.4)                |
| 8        | 40.7       | 3.11, t (7.4)                | 41.0                     | 3.33, t (7.4)                |
| 9        | -          | -                            | 21.1                     | 1.90, s                      |

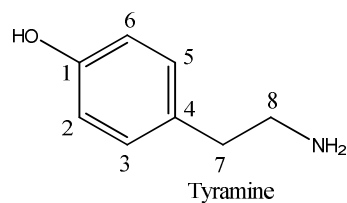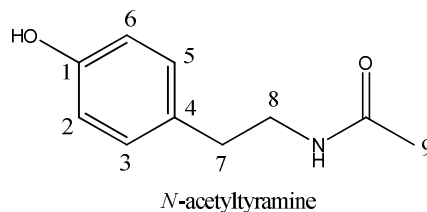

**Supplementary Table S2.** NMR assignment (protonated carbons) of tyramine and *N*-acetyltyramine standards (500 MHz, CD<sub>3</sub>OD).

| Position | Tyramine   |                              | <i>N</i> -acetyltyramine |                              |
|----------|------------|------------------------------|--------------------------|------------------------------|
|          | $\delta_c$ | $\delta_H$ ( <i>J</i> in Hz) | $\delta_c$               | $\delta_H$ ( <i>J</i> in Hz) |
| 2, 6     | 115.0      | 6.71, d (8.4)                | 114.9                    | 6.71, d (8.4)                |
| 3, 5     | 129.3      | 7.01, d (8.4)                | 129.3                    | 7.02, d (8.4)                |
| 7        | 37.7       | 2.65, t (7.2)                | 34.3                     | 2.68, t (7.4)                |
| 8        | 42.9       | 2.81, t (7.2)                | 41.0                     | 3.33, t (7.4)                |
| 9        | -          | -                            | 21.1                     | 1.90, s                      |

**Supplementary Table S3.** Relative abundance (estimated by NMR) of tyramine, *N*-acetyltyramine and diketopiperazines in the three QSI-active HPLC fractions 12, 13 and 14. Qualitative QSI activity is also indicated (\* weak activity, \*\* medium activity and \*\*\* high activity)

| HPLC fraction | QSI activity | Tyramine | <i>N</i> -acetyltyramine | DKP1* | DKP2* |
|---------------|--------------|----------|--------------------------|-------|-------|
| Fraction 12   | **           | 1.0      | 1.6                      | 5.0   | 0     |
| Fraction 13   | ***          | 1.1      | 3.5                      | 0     | 4.1   |
| Fraction 14   | *            | 1.1      | 0.4                      | 0     | 3.9   |

\*DKP1= cyclo-(L-Leu-L-*trans*-4-hydroxyproline); DKP2= cyclo-(D-Phe-L-*trans*-4-hydroxyproline)

Supplementary Table S4. ANiB values of strain M3-10 compared to the other *V. alginolyticus* strains whose genome is available

| M3-10           | M3-10   | GCA_000834155.1 | GCA_002149105.1 | GCA_001306845.1 | GCA_001273715.1 | GCA_002953975.1 | GCA_000467145.1 | GCA_001306825.1 | GCA_002119585.1 | GCA_001306875.1 | GCA_000153505.1 | GCA_000176055.1 | GCA_000834085.1 | GCA_002149065.1 | GCA_900460285.1 | GCA_900460325.1 | GCA_002119565.1 | GCA_002953535.1 | GCA_001471275.2 | GCA_001013315.1 | GCA_001306785.1 | GCA_002119545.1 | GCA_002953515.1 | GCA_001469735.1 | GCA_001584265.1 | GCA_001270205.1 | GCA_003613035.1 | GCA_002114195.1 | GCA_002119505.2 | GCA_001679745.1 | GCA_001525595.2 | GCA_000354175.2 | GCA_001267615.1 | GCA_003613065.1 | GCA_001617475.1 |        |
|-----------------|---------|-----------------|-----------------|-----------------|-----------------|-----------------|-----------------|-----------------|-----------------|-----------------|-----------------|-----------------|-----------------|-----------------|-----------------|-----------------|-----------------|-----------------|-----------------|-----------------|-----------------|-----------------|-----------------|-----------------|-----------------|-----------------|-----------------|-----------------|-----------------|-----------------|-----------------|-----------------|-----------------|-----------------|-----------------|--------|
| M3-10           | 100.000 | 98.631          | 98.456          | 98.541          | 98.554          | 98.551          | 98.541          | 98.549          | 98.469          | 98.455          | 98.556          | 98.540          | 98.441          | 98.624          | 98.475          | 98.566          | 98.499          | 98.476          | 98.503          | 98.514          | 98.571          | 98.542          | 98.469          | 98.525          | 98.564          | 98.471          | 98.531          | 98.499          | 98.519          | 98.477          | 98.466          | 98.508          | 98.555          | 98.576          | 98.469          | 98.495 |
| GCA_000834155.1 | 100.000 | 98.408          | 98.501          | 98.511          | 98.517          | 98.540          | 98.490          | 98.420          | 98.418          | 98.515          | 98.517          | 98.446          | 99.999          | 98.438          | 98.507          | 98.508          | 98.410          | 98.525          | 98.521          | 98.543          | 98.523          | 98.435          | 98.533          | 98.507          | 98.510          | 98.530          | 98.447          | 98.525          | 98.411          | 98.459          | 98.549          | 98.517          | 98.546          | 98.410          | 98.496          |        |
| GCA_002149105.1 | 100.000 | 98.429          | 98.416          | 98.419          | 98.421          | 98.406          | 99.998          | 99.996          | 98.415          | 98.417          | 98.356          | 98.429          | 99.996          | 98.419          | 98.474          | 99.997          | 98.404          | 98.425          | 98.408          | 98.421          | 99.998          | 98.413          | 98.460          | 98.398          | 98.416          | 99.997          | 98.439          | 99.997          | 98.380          | 98.409          | 98.388          | 98.407          | 99.997          | 98.418          |                 |        |
| GCA_001306845.1 | 100.000 | 98.500          | 98.549          | 98.534          | 98.521          | 98.422          | 98.419          | 99.997          | 98.573          | 98.432          | 98.513          | 98.431          | 98.519          | 98.486          | 98.424          | 98.523          | 98.513          | 98.550          | 98.537          | 98.425          | 98.507          | 98.515          | 98.483          | 98.465          | 98.452          | 98.490          | 98.426          | 98.494          | 98.513          | 98.525          | 98.488          | 98.431          | 98.477          |                 |                 |        |
| GCA_001273715.1 | 100.000 | 98.521          | 98.523          | 98.557          | 98.412          | 98.407          | 98.508          | 98.482          | 98.424          | 98.511          | 98.407          | 98.519          | 98.502          | 98.420          | 98.479          | 98.523          | 98.515          | 98.479          | 98.420          | 98.483          | 98.530          | 98.482          | 98.431          | 98.420          | 98.532          | 98.426          | 98.442          | 99.616          | 98.533          | 98.497          | 98.396          |                 |                 |                 |                 |        |
| GCA_002953975.1 | 100.000 | 99.997          | 98.508          | 98.420          | 98.427          | 98.490          | 98.530          | 98.400          | 98.536          | 98.393          | 99.997          | 98.465          | 98.429          | 98.507          | 99.998          | 98.512          | 98.492          | 98.414          | 98.506          | 98.521          | 98.478          | 98.443          | 98.389          | 98.525          | 98.407          | 98.459          | 98.510          | 99.990          | 98.567          | 98.431          | 98.471          |                 |                 |                 |                 |        |
| GCA_000467145.1 | 100.000 | 98.517          | 98.418          | 98.411          | 98.558          | 98.523          | 98.405          | 98.519          | 98.427          | 99.997          | 98.476          | 98.406          | 98.486          | 99.997          | 98.514          | 98.487          | 98.407          | 98.497          | 98.521          | 98.472          | 98.478          | 98.438          | 98.549          | 98.406          | 98.457          | 98.514          | 99.994          | 98.555          | 98.407          | 98.477          |                 |                 |                 |                 |                 |        |
| GCA_001306825.1 | 100.000 | 98.414          | 98.416          | 98.552          | 98.508          | 98.436          | 98.495          | 98.431          | 98.499          | 98.484          | 98.437          | 98.526          | 98.475          | 98.511          | 98.542          | 98.422          | 98.524          | 98.502          | 98.505          | 98.495          | 98.440          | 98.574          | 98.432          | 98.471          | 98.550          | 98.499          | 98.532          | 98.409          | 98.492          |                 |                 |                 |                 |                 |                 |        |
| GCA_002149065.1 | 100.000 | 99.997          | 98.418          | 98.426          | 98.355          | 98.415          | 99.998          | 98.422          | 98.459          | 99.997          | 98.419          | 98.434          | 98.420          | 98.422          | 99.997          | 98.404          | 98.452          | 98.411          | 98.400          | 99.998          | 98.444          | 99.999          | 98.389          | 98.391          | 98.380          | 98.378          | 99.998          | 98.397          |                 |                 |                 |                 |                 |                 |                 |        |
| GCA_002119585.1 | 100.000 | 98.434          | 98.436          | 98.351          | 98.404          | 99.997          | 98.437          | 98.473          | 99.997          | 98.416          | 98.412          | 98.419          | 98.428          | 99.998          | 98.405          | 98.467          | 98.414          | 98.412          | 99.996          | 98.448          | 99.998          | 98.392          | 98.404          | 98.401          | 98.382          | 99.997          | 98.424          |                 |                 |                 |                 |                 |                 |                 |                 |        |
| GCA_001306875.1 | 100.000 | 98.584          | 98.398          | 98.520          | 98.433          | 98.538          | 98.487          | 98.437          | 98.515          | 98.528          | 98.547          | 98.551          | 98.416          | 98.518          | 98.519          | 98.494          | 98.462          | 98.436          | 98.509          | 98.428          | 98.490          | 98.510          | 98.530          | 98.512          | 98.416          | 98.467          |                 |                 |                 |                 |                 |                 |                 |                 |                 |        |
| GCA_000153505.1 | 100.000 | 98.416          | 98.529          | 98.426          | 98.501          | 98.502          | 98.439          | 98.487          | 98.492          | 98.516          | 98.524          | 98.431          | 98.487          | 98.547          | 98.477          | 98.447          | 98.419          | 98.555          | 98.436          | 98.443          | 98.499          | 98.513          | 98.507          | 98.406          | 98.476          |                 |                 |                 |                 |                 |                 |                 |                 |                 |                 |        |
| GCA_000176055.1 | 100.000 | 98.459          | 98.375          | 98.396          | 98.409          | 98.360          | 98.400          | 98.416          | 98.420          | 98.427          | 98.361          | 98.411          | 98.477          | 98.428          | 98.397          | 98.380          | 98.413          | 98.380          | 98.341          | 98.420          | 98.410          | 98.416          | 98.355          | 98.450          |                 |                 |                 |                 |                 |                 |                 |                 |                 |                 |                 |        |
| GCA_000834085.1 | 100.000 | 98.427          | 98.531          | 98.524          | 98.403          | 98.537          | 98.529          | 98.555          | 98.516          | 98.444          | 98.531          | 98.513          | 98.524          | 98.535          | 98.442          | 98.514          | 98.413          | 98.450          | 98.537          | 98.512          | 98.512          | 98.422          | 98.500          |                 |                 |                 |                 |                 |                 |                 |                 |                 |                 |                 |                 |        |
| GCA_002149065.1 | 100.000 | 98.387          | 98.473          | 99.995          | 98.430          | 98.410          | 98.404          | 98.436          | 99.997          | 98.402          | 98.450          | 98.392          | 98.405          | 99.998          | 98.432          | 99.997          | 98.389          | 98.397          | 98.402          | 98.420          | 99.996          | 98.422          | 98.500          |                 |                 |                 |                 |                 |                 |                 |                 |                 |                 |                 |                 |        |
| GCA_900460285.1 | 100.000 | 98.474          | 98.434          | 98.492          | 99.997          | 98.515          | 98.489          | 98.428          | 98.501          | 98.515          | 98.463          | 98.454          | 98.390          | 98.547          | 98.446          | 98.464          | 98.506          | 99.990          | 98.557          | 98.428          | 98.470          |                 |                 |                 |                 |                 |                 |                 |                 |                 |                 |                 |                 |                 |                 |        |
| GCA_900460325.1 | 100.000 | 98.452          | 98.527          | 98.461          | 98.561          | 98.439          | 98.471          | 98.470          | 98.507          | 98.476          | 98.419          | 98.469          | 98.490          | 98.459          | 98.432          | 98.468          | 98.459          | 98.455          | 98.466          | 98.473          |                 |                 |                 |                 |                 |                 |                 |                 |                 |                 |                 |                 |                 |                 |                 |        |
| GCA_002119565.1 | 100.000 | 98.426          | 98.430          | 98.428          | 98.420          | 99.997          | 98.405          | 98.439          | 98.419          | 98.414          | 99.995          | 98.453          | 99.998          | 98.398          | 98.385          | 98.392          | 98.384          | 99.996          | 98.409          |                 |                 |                 |                 |                 |                 |                 |                 |                 |                 |                 |                 |                 |                 |                 |                 |        |
| GCA_002953535.1 | 100.000 | 98.508          | 98.517          | 98.487          | 98.399          | 98.503          | 98.523          | 98.485          | 98.459          | 98.448          | 98.497          | 98.420          | 98.464          | 98.478          | 98.475          | 98.488          | 98.405          | 98.535          |                 |                 |                 |                 |                 |                 |                 |                 |                 |                 |                 |                 |                 |                 |                 |                 |                 |        |
| GCA_001471275.2 | 100.000 | 98.538          | 98.504          | 98.427          | 98.487          | 98.513          | 98.481          | 98.457          | 98.410          | 98.533          | 98.426          | 98.466          | 98.514          | 99.988          | 98.548          | 98.421          | 98.466          |                 |                 |                 |                 |                 |                 |                 |                 |                 |                 |                 |                 |                 |                 |                 |                 |                 |                 |        |
| GCA_001013315.1 | 100.000 | 98.529          | 98.410          | 98.505          | 98.536          | 98.516          | 98.523          | 98.408          | 98.504          | 98.426          | 98.452          | 98.542          | 98.505          | 98.527          | 98.404          | 98.431          | 98.475          | 98.459          | 98.466          | 98.414          | 98.504          |                 |                 |                 |                 |                 |                 |                 |                 |                 |                 |                 |                 |                 |                 |        |
| GCA_001306785.1 | 100.000 | 98.410          | 98.506          | 98.507          | 98.514          | 98.651          | 98.456          | 98.527          | 98.404          | 98.431          | 98.475          | 98.459          | 98.466          | 98.414          | 98.504          |                 |                 |                 |                 |                 |                 |                 |                 |                 |                 |                 |                 |                 |                 |                 |                 |                 |                 |                 |                 |        |
| GCA_002119545.1 | 100.000 | 98.405          | 98.459          | 98.406          | 98.392          | 99.996          | 98.458          | 99.998          | 98.369          | 98.402          | 98.379          | 98.386          | 99.996          | 98.426          |                 |                 |                 |                 |                 |                 |                 |                 |                 |                 |                 |                 |                 |                 |                 |                 |                 |                 |                 |                 |                 |        |
| GCA_002953515.1 | 100.000 | 98.532          | 98.512          | 98.481          | 98.431          | 98.490          | 98.398          | 98.410          | 98.478          | 98.479          | 98.496          | 98.408          | 98.490          |                 |                 |                 |                 |                 |                 |                 |                 |                 |                 |                 |                 |                 |                 |                 |                 |                 |                 |                 |                 |                 |                 |        |
| GCA_001469735.1 | 100.000 | 98.512          | 98.530          | 98.439          | 98.505          | 98.454          | 98.467          | 98.504          | 98.525          | 98.507          | 98.481          | 98.536          |                 |                 |                 |                 |                 |                 |                 |                 |                 |                 |                 |                 |                 |                 |                 |                 |                 |                 |                 |                 |                 |                 |                 |        |
| GCA_001584265.1 | 100.000 | 98.469          | 98.401          | 98.434          | 98.439          | 98.368          | 98.480          | 98.473          | 98.473          | 98.434          | 98.485          |                 |                 |                 |                 |                 |                 |                 |                 |                 |                 |                 |                 |                 |                 |                 |                 |                 |                 |                 |                 |                 |                 |                 |                 |        |
| GCA_001270205.1 | 100.000 | 98.422          | 98.482          | 98.412          | 98.422          | 98.447          | 98.470          | 98.457          | 98.411          | 98.466          |                 |                 |                 |                 |                 |                 |                 |                 |                 |                 |                 |                 |                 |                 |                 |                 |                 |                 |                 |                 |                 |                 |                 |                 |                 |        |
| GCA_003613035.1 | 100.000 | 98.446          | 99.998          | 98.381          | 98.398          | 98.408          | 98.426          | 99.997          | 98.430          |                 |                 |                 |                 |                 |                 |                 |                 |                 |                 |                 |                 |                 |                 |                 |                 |                 |                 |                 |                 |                 |                 |                 |                 |                 |                 |        |
| GCA_002114195.1 | 100.000 | 98.466          | 98.496          | 98.446          | 98.521          | 98.524          | 98.459          | 98.464          |                 |                 |                 |                 |                 |                 |                 |                 |                 |                 |                 |                 |                 |                 |                 |                 |                 |                 |                 |                 |                 |                 |                 |                 |                 |                 |                 |        |
| GCA_002119505.2 | 100.000 | 98.396          | 98.389          | 98.403          | 98.391          | 99.998          | 98.405          |                 |                 |                 |                 |                 |                 |                 |                 |                 |                 |                 |                 |                 |                 |                 |                 |                 |                 |                 |                 |                 |                 |                 |                 |                 |                 |                 |                 |        |
| GCA_001679745.1 | 100.000 | 98.455          | 98.438          | 98.488          | 98.382          | 98.431          |                 |                 |                 |                 |                 |                 |                 |                 |                 |                 |                 |                 |                 |                 |                 |                 |                 |                 |                 |                 |                 |                 |                 |                 |                 |                 |                 |                 |                 |        |
| GCA_001525595.2 | 100.000 | 98.495          | 98.467          | 98.384          | 98.443          |                 |                 |                 |                 |                 |                 |                 |                 |                 |                 |                 |                 |                 |                 |                 |                 |                 |                 |                 |                 |                 |                 |                 |                 |                 |                 |                 |                 |                 |                 |        |
| GCA_000354175.2 | 100.000 | 98.529          | 98.397          | 98.485          |                 |                 |                 |                 |                 |                 |                 |                 |                 |                 |                 |                 |                 |                 |                 |                 |                 |                 |                 |                 |                 |                 |                 |                 |                 |                 |                 |                 |                 |                 |                 |        |
| GCA_001267615.1 | 100.000 | 98.422          | 98.520          |                 |                 |                 |                 |                 |                 |                 |                 |                 |                 |                 |                 |                 |                 |                 |                 |                 |                 |                 |                 |                 |                 |                 |                 |                 |                 |                 |                 |                 |                 |                 |                 |        |
| GCA_003613065.1 | 100.000 | 98.398          |                 |                 |                 |                 |                 |                 |                 |                 |                 |                 |                 |                 |                 |                 |                 |                 |                 |                 |                 |                 |                 |                 |                 |                 |                 |                 |                 |                 |                 |                 |                 |                 |                 |        |
| GCA_001617475.1 | 100.000 |                 |                 |                 |                 |                 |                 |                 |                 |                 |                 |                 |                 |                 |                 |                 |                 |                 |                 |                 |                 |                 |                 |                 |                 |                 |                 |                 |                 |                 |                 |                 |                 |                 |                 |        |

Color key  
 > 98  
 > 98.5  
 > 99

**Supplementary Table S5.** Protein sequence accession numbers for tyrosine decarboxylases used in the BLASTp homologue search.

|                      |                      |                      |
|----------------------|----------------------|----------------------|
| 1. CAI39170.2_1      | 2. CAI39169.2_1      | 3. AFP73381.1_1      |
| 4. AGW24520.1_1      | 5. AGW24519.1_1      | 6. BAE02560.1_1      |
| 7. ACS15340.1_1      | 8. ACS15339.1_1      | 9. ACS15338.1_1      |
| 10. CAY83536.1_1     | 11. CAY83534.1_1     | 12. CAY72357.1_1     |
| 13. CAY72352.1_1     | 14. CAY72349.1_1     | 15. CAY72347.1_1     |
| 16. CAY72344.1_1     | 17. CAY72343.1_1     | 18. CAY72341.1_1     |
| 19. CAY72338.1_1     | 20. CAY72336.1_1     | 21. CAY72335.1_1     |
| 22. CAY72333.1_1     | 23. CAY72330.1_1     | 24. BAE02559.1_1     |
| 25. AWT58522.1_1     | 26. AWT58521.1_1     | 27. AWT58520.1_1     |
| 28. AWT58519.1_1     | 29. AWT58518.1_1     | 30. AWT58517.1_1     |
| 31. AWT58516.1_1     | 32. BAI67125.1_1     | 33. WP_135180232.1_1 |
| 34. WP_135017352.1_1 | 35. E4V23_RS18420    | 36. WP_135043646.1_1 |
| 37. E4V46_RS09510    | 38. TFU21072.1_3     | 39. TFU11427.1_1     |
| 40. TFT82455.1_1     | 41. TFT56894.1_1     | 42. TFT37476.1_1     |
| 43. EVY62_RS19255    | 44. WP_129949649.1_1 | 45. WP_088207211.1_1 |
| 46. RZA37683.1_1     | 47. RZA37564.1_3     | 48. RYH14358.1_1     |
| 49. BHE89_RS17365    | 50. H049_RS0124195   | 51. H049_RS0123705   |
| 52. EBQ16_RS07935    | 53. WP_121909587.1_1 | 54. EA135_RS16540    |
| 55. RLZ56634.1_1     | 56. RLZ55416.1_1     | 57. C3O82_RS13145    |
| 58. RBH48265.1_1     | 59. RBH41953.1_1     | 60. WP_017628132.1_1 |
| 61. PSQ86773.1_1     | 62. PSQ85593.1_4     | 63. BRD33_05025      |
| 64. CUS67_RS12755    | 65. WP_104877381.1_2 | 66. CUM70_RS13060    |
| 67. CUM70_RS13050    | 68. PQF68676.1_2     | 69. CUS67_12755      |
| 70. PQD88208.1_1     | 71. PQD88205.1_1     | 72. C4A96_RS26915    |
| 73. C4A96_RS06470    | 74. C4A96_RS04445    | 75. C4A96_RS04265    |
| 76. PKN32413.1_1     | 77. CQR37_RS16425    | 78. PHL20111.1_1     |
| 79. OUK41848.1_2     | 80. OUK40079.1_2     | 81. OSP71327.1_1     |
| 82. OSP67774.1_2     | 83. WP_071425714.1_1 | 84. WP_080389721.1_2 |
| 85. WP_011109458.1_1 | 86. OIK52589.1_1     | 87. BHE89_18525      |
| 88. KXF72672.1_2     | 89. KRM71154.1_1     | 90. EAO52030.1_1     |
| 91. CBW46640.1_1     | 92. ABC68277.1_1     | 93. CAH04395.1_1     |
| 94. SCD69325.1_2     |                      |                      |

**Supplementary methods S1. Identification of QSI compounds in active HPLC fractions using LC-DAD-HRMS and NMR analyses.**

After LC-DAD-HRMS analyses, dereplication against our in-house databases [1] identified the presence of both tyramine and *N*-acetyltyramine (Figure 1) in each of the three bioactive HPLC fractions (Figure S3). On the other hand, NMR signals from two different compounds compatible with those reported for tyramine [5] and *N*-acetyltyramine [5,6] were present in all three fractions, while signals corresponding to other compounds (diketopiperazines) were only observed in one or two of the three bioactive fractions (see Figures S4-S6). Interpretation of 2D NMR spectra (COSY, HSQC and HMBC; data not shown) confirmed the dereplication of tyramine and *N*-acetyltyramine in the three fractions and established the presence of cyclo-(L-Leu-L-trans-4-hydroxyproline) in fraction 12 [3] and cyclo-(D-Phe-L-trans-4-hydroxyproline) in fractions 13 and 14 [4]. Additionally, the identity of tyramine and *N*-acetyltyramine was definitively confirmed by directly comparing the NMR spectra (1H and HSQC) of the three bioactive fractions with the spectra of the standards of these two related compounds acquired in the same spectrometer (see Supplementary Figures S7-S13 and Supplementary Tables S4 and S5). The relative abundance of tyramine, *N*-acetyltyramine and diketopiperazines in the three fractions was easily established from the 1H NMR spectra (see Table S1), clearly indicating that either tyramine, *N*-acetyltyramine or both are the QSI compounds produced by the *V. alginolyticus* M3-10 strain. A QSI activity test carried out with pure standards of these two related molecules later confirmed that both are indeed QSI compounds.

### Supplementary material references

1. Pérez-Victoria, I.; Martín, J.; Reyes, F. Combined LC/UV/MS and NMR Strategies for the Dereplication of Marine Natural Products. *Planta Med.* **2016**, *82*, 857–871.
2. Martín, J.; Crespo, G.; González-Menéndez, V.; Pérez-Moreno, G.; Sánchez-Carrasco, P.; Pérez-Victoria, I.; Ruiz-Pérez, L.M.; González-Pacanowska, D.; Vicente, F.; Genilloud, O.; et al. MDN-0104, an Antiplasmodial Betaine Lipid from *Heterospora chenopodii*. *J. Nat. Prod.* **2014**, *77*, 2118–2123.
3. Rustamova, N.; Bobakulov, K.; Begmatov, N.; Turak, A.; Yili, A.; Aisa, H.A. Secondary metabolites produced by endophytic *Pantoea ananatis* derived from roots of *Baccharoides anthelmintica* and their effect on melanin synthesis in murine B16 cells. *Nat. Prod. Res.* **2019**, 1–6.
4. Ye, X.; Chai, W.; Lian, X.-Y.; Zhang, Z. Novel propanamide analogue and antiproliferative diketopiperazines from mangrove *Streptomyces* sp. Q24. *Nat. Prod. Res.* **2017**, *31*, 1390–1396.
5. Sun, J.F.; Wu, Y.; Yang, B.; Liu, Y. Chemical Constituents of Marine Sponge *Halichondria* sp. from South China Sea. *Chem. Nat. Compd.* **2015**, *51*, 975–977.
6. Gutiérrez, M.; Capson, T.L.; Guzmán, H.M.; González, J.; Ortega-Barría, E.; Quiñoá, E.; Riguera, R. Antiplasmodial metabolites isolated from the marine octocoral *Muricea austera*. *J. Nat. Prod.* **2006**, *69*, 1379–1383.
